# Supplementary material for: Evaluation of the importance of fever with respect to dengue prognosis according to the 2009 WHO classification: a retrospective study
Source: PubMed Central journal article supplement (PMC5209937; doi:10.1186/s12879-016-2128-4), 2017-01-04
Supplement: 12879_2016_2128_MOESM1_ESM.pdf [file 12879_2016_2128_MOESM1_ESM.pdf]

**MINISTÉRIO DA SAÚDE  
SECRETARIA DE VIGILÂNCIA EM SAÚDE  
DEPARTAMENTO DE VIGILÂNCIA EPIDEMIOLÓGICA  
COORDENAÇÃO GERAL DE DOENÇAS TRANSMISSÍVEIS  
GT-SINAN**

**SISTEMA DE INFORMAÇÃO DE AGRAVO DE NOTIFICAÇÃO - SINAN  
DICIONÁRIO DE DADOS – AMBIENTE WINDOWS**

**AGRAVO: DENGUE**

| CAMPO DA FICHA                                                                                                                                                                                                        |          | BANCO DE DADOS ( DBF ) |            |                                 |                                                                                                                                                                                                                                                                                                                                                                                     |                                                                                 |
|-----------------------------------------------------------------------------------------------------------------------------------------------------------------------------------------------------------------------|----------|------------------------|------------|---------------------------------|-------------------------------------------------------------------------------------------------------------------------------------------------------------------------------------------------------------------------------------------------------------------------------------------------------------------------------------------------------------------------------------|---------------------------------------------------------------------------------|
| NOME                                                                                                                                                                                                                  | TIPO     | TAM                    | NOME       | CATEGORIAS                      | DESCRIÇÃO                                                                                                                                                                                                                                                                                                                                                                           | CARACTERÍSTICAS/<br>CRÍTICA DE CONSISTENCIA                                     |
| Nº de notificação e campos de 1 a 25 dos blocos “ Dados Gerais” , “ Dados do Caso” e “ Dados de residência “ correspondem aso mesmos campos da ficha de notificação ( ver dicionário de dados da ficha de notificação |          |                        |            |                                 |                                                                                                                                                                                                                                                                                                                                                                                     |                                                                                 |
| Data de investigação                                                                                                                                                                                                  | Data     |                        | ANT_DT_INV |                                 | Data em que ocorreu a investigação – informar a Data da 1ª visita ao paciente                                                                                                                                                                                                                                                                                                       | Data da investigação > ou = Data da notificação<br>Campo obrigatório            |
| Ocupação/ Ramo de Atividade Econômica                                                                                                                                                                                 | Caracter | 5                      | OCUPACAO   |                                 | Informar a atividade exercida pelo paciente no setor formal, informal ou autônomo ou sua última atividade exercida quando paciente for desempregado. O ramo de atividade econômica do paciente refere-se as atividades econômicas desenvolvidas nos processos de produção do setor primário (agricultura e extrativismo); secundário (indústria) ou terciário (serviços e comércio) |                                                                                 |
| Deslocamento                                                                                                                                                                                                          |          |                        |            |                                 | Deslocamento (Datas e locais freqüentados no período de 15 meses anteriores ao início dos sinais e sintomas                                                                                                                                                                                                                                                                         | Preenchimento apenas na ficha                                                   |
| Teve dengue antes                                                                                                                                                                                                     | Caracter | 1                      | DENGUE     | 1- Sim<br>2- Não<br>9- Ignorado | Se o paciente já teve dengue anterior a esta notificação                                                                                                                                                                                                                                                                                                                            | Se categoria = 2 ou = 9, pular para campo 31<br>(vacinado contra febre amarela) |
| Caso sim, ano                                                                                                                                                                                                         | Caracter | 4                      | ANO        | Ex: 1999                        | Ano em que adoeceu de dengue anteriormente                                                                                                                                                                                                                                                                                                                                          |                                                                                 |
| Vacinado contra febre amarela                                                                                                                                                                                         | Caracter | 1                      | VACINADO   | 1- Sim<br>2- Não<br>9- Ignorado |                                                                                                                                                                                                                                                                                                                                                                                     | Se categoria = 2 ou 9 pular para campo 33<br>(febre)                            |
| Data da última dose                                                                                                                                                                                                   | Data     |                        | DT_DOSE    |                                 | Dia, mês e ano da última dose da vacina contra febre amarela                                                                                                                                                                                                                                                                                                                        |                                                                                 |

|                                              |             |                               |             |                                                |                                                          |                                                              |
|----------------------------------------------|-------------|-------------------------------|-------------|------------------------------------------------|----------------------------------------------------------|--------------------------------------------------------------|
| Sinais e sintomas Febre                      | Caracter    | 1                             | FEBRE       | 1- Sim<br>2- Não<br>9- Ignorado                | Se o paciente relatou febre com duração máxima de 7 dias | Se categoria = 2 ou = 9, pular para campo 36 (prova do laço) |
| Data do início                               | Data        |                               | DT_FEBRE    |                                                | Dia, mês e ano do início da febre                        |                                                              |
| <b>CAMPO DA FICHA</b>                        |             | <b>BANCO DE DADOS ( DBF )</b> |             |                                                |                                                          |                                                              |
| <b>NOME</b>                                  | <b>TIPO</b> | <b>TAM</b>                    | <b>NOME</b> | <b>CATEGORIAS</b>                              | <b>DESCRIÇÃO</b>                                         | <b>CARACTERISTICAS/<br/>CRÍTICA DE CONSISTENCIA</b>          |
| Duração da febre em dias                     | Numérica    | 2                             | DURACAO     |                                                |                                                          |                                                              |
| prova do laço                                | Caracter    | 1                             | LACO        | 1- Positiva<br>2- Negativa<br>3- Não realizada | Resultado da prova do laço                               |                                                              |
| Outros sinais e sintomas Cefaléia            | Caracter    | 1                             | CEFALEIA    | 1- Sim<br>2- Não<br>9- Ignorado                | Paciente relatou presença de exantema                    |                                                              |
| Outros sinais e sintomas dor retro-orbitária | Caracter    | 1                             | DOR         | 1- Sim<br>2- Não<br>9- Ignorado                | Paciente relatou dor retroorbitária                      |                                                              |
| Outros sinais e sintomas mialgia             | Caracter    | 1                             | MIALGIA     | 1- Sim<br>2- Não<br>9- Ignorado                | Paciente relatou mialgia                                 |                                                              |
| Outros sinais e sintomas Artralgia           | Caracter    | 1                             | ARTRALGIA   | 1- Sim<br>2- Não<br>9- Ignorado                | Paciente relatou artralgia                               |                                                              |
| Outros sinais e sintomas Diarréia            | Caracter    | 1                             | DIARREIA    | 1- Sim<br>2- Não<br>9- Ignorado                | Paciente teve diarréia                                   |                                                              |
| Outros sinais e sintomas Exantema            | Caracter    | 1                             | EXANTEMA    | 1- Sim<br>2- Não<br>9- Ignorado                | Paciente relatou cefaléia                                |                                                              |
| Outros sinais e sintomas prostração          | Caracter    | 1                             | PROSTACAO   | 1- Sim<br>2- Não<br>9- Ignorado                | Paciente relatou prostração                              |                                                              |
| Outros sinais e sintomas náuseas/vômitos     | Caracter    | 1                             | NAUSEAS     | 1- Sim<br>2- Não<br>9- Ignorado                | Paciente apresentou náusea                               |                                                              |
| Outros sinais e sintomas Outros              | Caracter    | 1                             | OUTROS      | 1- Sim<br>2- Não<br>9- Ignorado                | Se o paciente apresentou outros sinais e sintomas        | Se categoria = 1 habilitar para especificar outros           |
| Outros especificar                           | Caracter    | 20                            | SIN_OUT     |                                                | Descrever quais foram outros sinais e sintomas           |                                                              |

|                                                                     |                               |            |             |                                 |                                                                     |                                                     |
|---------------------------------------------------------------------|-------------------------------|------------|-------------|---------------------------------|---------------------------------------------------------------------|-----------------------------------------------------|
| Manifestações hemorrágicas espontâneas Epistaxe                     | Caracter                      | 1          | EPISTAXE    | 1- Sim<br>2- Não<br>9- Ignorado |                                                                     |                                                     |
| <b>CAMPO DA FICHA</b>                                               | <b>BANCO DE DADOS ( DBF )</b> |            |             |                                 |                                                                     |                                                     |
| <b>NOME</b>                                                         | <b>TIPO</b>                   | <b>TAM</b> | <b>NOME</b> | <b>CATEGORIAS</b>               | <b>DESCRIÇÃO</b>                                                    | <b>CARACTERISTICAS/<br/>CRÍTICA DE CONSISTENCIA</b> |
| Manifestações hemorrágicas espontâneas Gengivorragia                | Caracter                      | 1          | GENGIVO     | 1- Sim<br>2- Não<br>9- Ignorado |                                                                     |                                                     |
| Manifestações hemorrágicas espontâneas Hematúria                    | Caracter                      | 1          | HEMATURA    | 1- Sim<br>2- Não<br>9- Ignorado |                                                                     |                                                     |
| Manifestações hemorrágicas espontâneas Petéquias                    | Caracter                      | 1          | PETEQUIAS   | 1- Sim<br>2- Não<br>9- Ignorado |                                                                     |                                                     |
| Manifestações hemorrágicas espontâneas Metrorragia                  | Caracter                      | 1          | METRO       | 1- Sim<br>2- Não<br>9- Ignorado |                                                                     |                                                     |
| Manifestações hemorrágicas espontâneas Sangramento Gastrointestinal | Caracter                      | 1          | SANGRAM     | 1- Sim<br>2- Não<br>9- Ignorado |                                                                     |                                                     |
| Manifestações hemorrágicas espontâneas Outras                       | Caracter                      | 1          | OUTROS_M    | 1- Sim<br>2- Não<br>9- Ignorado | Paciente apresentou outras manifestações hemorrágicas espontâneas   | Se categoria = 1 habilitar para especificar outras  |
| Outras especificar                                                  | Caracter                      | 20         | OUTROS_M_D  |                                 | Descrever quais foram outras manifestações hemorrágicas espontâneas |                                                     |
| Derrame cavitário Ascite                                            | Caracter                      | 1          | ASCITE      | 1- Sim<br>2- Não<br>9- Ignorado |                                                                     |                                                     |
| Derrame cavitário Derrame pleural                                   | Caracter                      | 1          | PLEURAL     | 1- Sim<br>2- Não<br>9- Ignorado |                                                                     |                                                     |
| Derrame cavitário Derrame pericárdico                               | Caracter                      | 1          | PERICARDI   | 1- Sim<br>2- Não<br>9- Ignorado |                                                                     |                                                     |

|                                                               |                               |            |             |                                  |                                                                             |                                                               |
|---------------------------------------------------------------|-------------------------------|------------|-------------|----------------------------------|-----------------------------------------------------------------------------|---------------------------------------------------------------|
| Sinais de alerta e/ou gravidade dor abdominal intensa         | Caracter                      | 1          | ABDOMINAL   | 1- Sim<br>2- Não<br>9- Ignorado  | Paciente relatou dor abdominal intensa                                      |                                                               |
| <b>CAMPO DA FICHA</b>                                         | <b>BANCO DE DADOS ( DBF )</b> |            |             |                                  |                                                                             |                                                               |
| <b>NOME</b>                                                   | <b>TIPO</b>                   | <b>TAM</b> | <b>NOME</b> | <b>CATEGORIAS</b>                | <b>DESCRIÇÃO</b>                                                            | <b>CARACTERISTICAS/<br/>CRÍTICA DE CONSISTENCIA</b>           |
| Sinais de alerta e/ou gravidade Hipotensão arterial /postural | Caracter                      | 1          | HIPOTENSAO  | 1- Sim<br>2- Não<br>9- Ignorado  | Paciente apresenta Hipotensão arterial/postural                             |                                                               |
| Sinais de alerta e/ou gravidade Manifestações neurológicas    | Caracter                      | 1          | MANIFESTA   | 1- Sim<br>2- Não<br>9- Ignorado  | Manifestações neurológicas                                                  |                                                               |
| Sinais de alerta e/ou gravidade Hepatomegalia dolorosa        | Caracter                      | 1          | HEPATO      | 1- Sim<br>2- Não<br>9- Ignorado  | Paciente apresenta hepatomegalia dolorosa                                   |                                                               |
| Sinais de alerta e/ou gravidade Choque hipovolêmico           | Caracter                      | 1          | CHOQUE      | 1- Sim<br>2- Não<br>9- Ignorado  | Paciente apresenta situação de choque hipovolêmico                          |                                                               |
| Sinais de alerta e/ou gravidade Insuficiência hepática        | Caracter                      | 1          | INSUFICIEN  | 1- Sim<br>2- Não<br>9- Ignorado  | Paciente apresenta situação de insuficiência hepática                       |                                                               |
| Sinais de alerta e/ou gravidade Miocardite                    | Caracter                      | 1          | MIOCARDI    | 1- Sim<br>2- Não<br>9- Ignorado  | Paciente apresenta situação de miocardite                                   |                                                               |
| Sinais de alerta e/ou gravidade Outros                        | Caracter                      | 1          | OUTRO_S     | 1- Sim<br>2- Não<br>9- Ignorado  | Paciente apresentou outros sinais de alerta e/ou gravidade                  | Se categoria = 1 habilitar para especificar outros            |
| Outros especificar                                            | Caracter                      | 20         | OUTRO_S_D   |                                  | Descrever quais foram outros sinais de alerta e/ou gravidade                |                                                               |
| Data do Choque ou hipotensão                                  | Data                          |            | DT_CHOQUE   |                                  |                                                                             |                                                               |
| Ocorreu Hospitalização?                                       | Caracter                      | 1          | HOSPITALIZ  | 1- sim<br>2- não<br>9 – ignorado | Se ocorreu hospitalização com o paciente, decorrente de doença exantemática | Se hospitalização = 2 ou 9 pular para campo 49 ( hematócrito) |
| Data da internação                                            | Data                          |            | DT_INTERNA  |                                  | Data de internação, caso tenha ocorrido                                     |                                                               |
| UF de hospitalização                                          | Caracter                      | 2          | UF          |                                  | Sigla da UF onde o paciente foi internado                                   |                                                               |
| Município do hospital                                         | Caracter                      | 7          | MUNICIPIO   |                                  | Nome completo do município onde o paciente foi internado                    |                                                               |
| Nome do hospital                                              | Caracter                      | 7          | HOSPITAL    |                                  | Nome completo do Hospital onde o paciente foi internado                     |                                                               |
| Endereço do hospital                                          | Caracter                      | 60         | ENDERECO    |                                  |                                                                             |                                                               |

|                                                 |                               |            |             |                                                                       |                                                        |                                                     |
|-------------------------------------------------|-------------------------------|------------|-------------|-----------------------------------------------------------------------|--------------------------------------------------------|-----------------------------------------------------|
| Telefone                                        | Caracter                      | 17         | TELEFONE    |                                                                       |                                                        |                                                     |
| Data da coleta                                  | Data                          |            | DT_COL_HEM  |                                                                       | Data da coleta de sangue para exame de hematócrito     |                                                     |
| <b>CAMPO DA FICHA</b>                           | <b>BANCO DE DADOS ( DBF )</b> |            |             |                                                                       |                                                        |                                                     |
| <b>NOME</b>                                     | <b>TIPO</b>                   | <b>TAM</b> | <b>NOME</b> | <b>CATEGORIAS</b>                                                     | <b>DESCRIÇÃO</b>                                       | <b>CARACTERISTICAS/<br/>CRÍTICA DE CONSISTENCIA</b> |
| Dados laboratoriais:<br>hematócrito (maior)     | Numérica                      |            | HEMA_MAIOR  |                                                                       | Resultado do hematócrito (em %, maior valor)           | 4 dígitos sendo um decimal                          |
| Data da coleta                                  | Data                          |            | DT_COL_PLQ  |                                                                       | Data da coleta sangue para exame de plaquetas          |                                                     |
| Plaquetas                                       | Numérica                      |            | PALQ_MAIOR  |                                                                       | Resultado do exame (plaquetas- em mm3, maior valor)    |                                                     |
| Data da coleta                                  | Data                          |            | DT_COL_HE2  |                                                                       | Data da coleta de sangue para exame de hematócrito     |                                                     |
| Hematócrito (menor)                             | Numérica                      |            | HEMA_MENOR  |                                                                       | Resultado do hematócrito (em %, menor valor)           |                                                     |
| Data da coleta                                  | Data                          |            | DT_COL_PL2  |                                                                       | Data do resultado do exame de plaquetas                |                                                     |
| Plaquetas                                       | Numérica                      |            | PLAQ_MENOR  |                                                                       | Resultado do exame (plaquetas- em mm3, menor valor)    |                                                     |
| Sorologia<br>Data da coleta da 1ª<br>Amostra    | Data                          |            | DT_SORO1    |                                                                       | Data da realização da coleta da 1ª sorologia           | Data 1ª COLETA > ou = DT NOTIF.                     |
| Sorologia<br>Data da coleta da 2ª<br>Amostra    | Data                          |            | DT_SORO2    |                                                                       | Data da realização da coleta da 2ª sorologia           | DT 2ªCOLETA que DT 1ª COLETA                        |
| Sorologia<br>Data do resultado da 1ª<br>amostra | Data                          |            | DT_SOROR1   |                                                                       | Data de recebimento do resultado da 1ª amostra pela VE | DT 1º REC. RESULT. > DT 1ª COLETA                   |
| Data do resultado da 2ª<br>amostra              | Data                          |            | DT_SOROR2   |                                                                       | Data de recebimento do resultado da 2ª amostra pela VE | DT 2º REC. RESULT. > DT 2ª COLETA                   |
| Resultado exame<br>IgM S1                       | Caracter                      | 1          | S1_IGM      | 1- reagente<br>2- não reagente<br>3- inconclusivo<br>4- não realizado | Resultado da 1ª sorologia - IgM                        |                                                     |
| Resultado exame<br>IgM S2                       | Caracter                      | 1          | S2_IGM      | 1. reagente<br>2. não reagente<br>3. inconclusivo<br>4. não realizado | resultado 2ª sorologia, – IgM                          |                                                     |

|                                       |             |                               |             |                                                                                          |                                                                       |                                                            |
|---------------------------------------|-------------|-------------------------------|-------------|------------------------------------------------------------------------------------------|-----------------------------------------------------------------------|------------------------------------------------------------|
| Resultado exame IgG S1                | Caracter    | 1                             | S1_IGG      | 1. reagente<br>2. não reagente<br>3. inconclusivo<br>4. não realizado                    | resultado da 1ª sorologia - IgG                                       |                                                            |
| <b>CAMPO DA FICHA</b>                 |             | <b>BANCO DE DADOS ( DBF )</b> |             |                                                                                          |                                                                       |                                                            |
| <b>NOME</b>                           | <b>TIPO</b> | <b>TAM</b>                    | <b>NOME</b> | <b>CATEGORIAS</b>                                                                        | <b>DESCRIÇÃO</b>                                                      | <b>CARACTERISTICAS/<br/>CRÍTICA DE CONSISTENCIA</b>        |
| Resultado exame IgG S2                | Caracter    | 1                             | S2_IGG      | 1. reagente<br>2. não reagente<br>3. inconclusivo<br>4. não realizado                    | resultado da 2ª sorologia – IgG                                       |                                                            |
| TítulosS1                             | Número      |                               | S1_TIT1     | 1: _ _ _ _                                                                               | Resultado dos títulos para a 1ª sorologia                             | 4 dígitos                                                  |
| Títulos S2                            | Número      |                               | S2_TIT1     | 1: _ _ _ _                                                                               | Resultado dos títulos para a 1ª sorologia                             | 4 dígitos                                                  |
| Isolamento de vírus – colheu material | Caracter    | 1                             | MATERIAL    | 1- sim<br>2- não<br>9 – ignorado                                                         | Se foi colhido material para realização de isolamento viral           | Se categoria=2 ou =9, pular para campo 65 (Histopatologia) |
| Tipo de material Soro na 1ª amostra   | Caracter    | 1                             | SORO1       | 1- sim<br>2- não<br>9. ignorado                                                          | Se foi colhido soro na 1ª amostra para realização de isolamento viral |                                                            |
| Tipo de material Soro na 2ª amostra   | Caracter    | 1                             | SORO2       | 1. sim<br>2. não<br>9. ignorado                                                          | Se foi colhido soro na 2ª amostra para realização de isolamento viral |                                                            |
| Tipo de material Tecido               | Caracter    | 1                             | TECIDOS     | 1. sim<br>2. não<br>9. ignorado                                                          | Se foi colhido tecido para realização de isolamento viral             |                                                            |
| Resultado                             | Caracter    | 1                             | RESUL_VIRA  | 1- Sorotipo I<br>2- Sorotipo II<br>3- Sorotipo III<br>4- Sorotipo IV<br>5- Não detectado | Sorotipo                                                              |                                                            |
| Patologia Histopatologia              | Caracter    | 1                             | HISTOPA     | 1. compatível<br>2. negativo<br>9. não realizado                                         |                                                                       |                                                            |
| Imunohistoquímica                     | Caracter    | 1                             | IMUNOH      | 1. positivo<br>2. negativo<br>3. não realizado                                           |                                                                       |                                                            |

|                                                     |                               |            |             |                                                                                                                                              |                                                                                   |                                                                             |
|-----------------------------------------------------|-------------------------------|------------|-------------|----------------------------------------------------------------------------------------------------------------------------------------------|-----------------------------------------------------------------------------------|-----------------------------------------------------------------------------|
| PCR<br>Tipo de amostra                              | Caracter                      | 1          | AMOS_PCR    | 1. soro<br>2. tecidos                                                                                                                        |                                                                                   |                                                                             |
| Resultado                                           | Caracter                      | 1          | RESUL_PCR   | 1. positivo<br>2. negativo                                                                                                                   |                                                                                   |                                                                             |
| Outro tipo de amostra                               | Caracter                      | 1          | AMOS_OUT    | 1- soro<br>2- tecidos                                                                                                                        |                                                                                   |                                                                             |
| <b>CAMPO DA FICHA</b>                               | <b>BANCO DE DADOS ( DBF )</b> |            |             |                                                                                                                                              |                                                                                   |                                                                             |
| <b>NOME</b>                                         | <b>TIPO</b>                   | <b>TAM</b> | <b>NOME</b> | <b>CATEGORIAS</b>                                                                                                                            | <b>DESCRIÇÃO</b>                                                                  | <b>CARACTERISTICAS/<br/>CRÍTICA DE CONSISTENCIA</b>                         |
| Técnica Utilizada                                   | Caracter                      | 20         | TECNICA     |                                                                                                                                              |                                                                                   |                                                                             |
| Resultado                                           | Caracter                      | 1          | RESULT_OUT  | 1- positivo<br>2- negativo                                                                                                                   |                                                                                   |                                                                             |
| Classificação final                                 | Caracter                      | 1          | COM_CLASSI  | 1- Dengue Clássico<br>2- Dengue com complicações<br>3- Febre Hemorrágica do Dengue – FHD<br>4- Síndrome de choque da Dengue<br>5- Descartado | Conclusão da investigação                                                         |                                                                             |
| Critério de confirmação/ descarte<br>No caso de FHD | Caracter                      | 1          | CON_CRITER  | 1. Laboratorial<br>2. Vínculo Epidemiológico                                                                                                 | Critério de confirmação/ descarte                                                 | Habilitar apenas para a categoria 3 ( FHD )<br>no campo classificação final |
|                                                     | Caracter                      | 1          | CON_FHD     | 1. Grau I<br>2. Grau II<br>3. Grau III<br>4. Grau IV                                                                                         |                                                                                   |                                                                             |
| Local provável da fonte de infecção<br>bairro       | Caracter                      | 9          | CON_INF_BA  |                                                                                                                                              | Identificar o bairro da provável da fonte de infecção                             |                                                                             |
| Local provável da fonte de infecção<br>Distrito     | Caracter                      | 4          | CON_INF_DI  |                                                                                                                                              | Identificar o distrito da provável da fonte de infecção                           |                                                                             |
| Local provável da fonte de infecção<br>Município    | Caracter                      | 7          | CON_INF_MU  |                                                                                                                                              | Identificar o município da provável da fonte de infecção                          |                                                                             |
| Local provável da fonte de infecção<br>UF           | Caracter                      | 2          | CON_INF_UF  |                                                                                                                                              | Identificar a UF provável da fonte de infecção                                    |                                                                             |
| Local provável da fonte de infecção<br>País         | Caracter                      | 3          | CON_INF_PA  |                                                                                                                                              | Preencher se o caso foi infectado em outro país                                   |                                                                             |
| Doença relacionada ao trabalho                      | Caracter                      | 1          | CON_DOENCA  |                                                                                                                                              | Se o paciente adquiriu a doença em decorrência das condições/situação do trabalho |                                                                             |

|                      |          |   |            |                                    |                              |                                                          |
|----------------------|----------|---|------------|------------------------------------|------------------------------|----------------------------------------------------------|
| Evolução do caso     | Caracter | 1 | CON_EVOLUC | 1. cura<br>2. óbito<br>9- ignorado | evolução do caso             | Se categoria = 1 ou 9 pular para dt de encerramento (82) |
| Data do óbito        | Data     |   | CON_DT_OBI |                                    | Data do óbito                |                                                          |
| Data do encerramento | Data     |   | CON_DT_ENC |                                    | Data do encerramento do caso |                                                          |



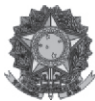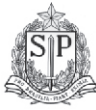

**CASO SUSPEITO:** Paciente com **febre** com duração máxima de 7 dias, acompanhada de pelo menos **dois dos seguintes sintomas** : cefaléia, dor retroorbital, mialgia, artralgia, prostração, exantema e com exposição à área com transmissão de dengue ou com presença de Aedes aegypti nos últimos quinze dias.

|                        |               |                                                |                                           |                                                                                                                             |                                |                                                     |                                                                                                                                                                                                                                                                                                                                                                                                                                                               |                                    |
|------------------------|---------------|------------------------------------------------|-------------------------------------------|-----------------------------------------------------------------------------------------------------------------------------|--------------------------------|-----------------------------------------------------|---------------------------------------------------------------------------------------------------------------------------------------------------------------------------------------------------------------------------------------------------------------------------------------------------------------------------------------------------------------------------------------------------------------------------------------------------------------|------------------------------------|
| Dados Gerais           | 1             | Tipo de Notificação                            |                                           | 2 - Individual                                                                                                              |                                |                                                     |                                                                                                                                                                                                                                                                                                                                                                                                                                                               |                                    |
|                        | 2             | Agravado/doença                                |                                           | Código (CID10)                                                                                                              | 3                              | Data da Notificação                                 |                                                                                                                                                                                                                                                                                                                                                                                                                                                               |                                    |
|                        | <b>DENGUE</b> |                                                | <b>A 90</b>                               |                                                                                                                             |                                |                                                     |                                                                                                                                                                                                                                                                                                                                                                                                                                                               |                                    |
| Notificação Individual | 4             | UF                                             | 5                                         | Município de Notificação                                                                                                    |                                | Código (IBGE)                                       |                                                                                                                                                                                                                                                                                                                                                                                                                                                               |                                    |
|                        | 6             | Unidade de Saúde (ou outra fonte notificadora) |                                           | Código                                                                                                                      | 7                              | Data dos Primeiros Sintomas                         |                                                                                                                                                                                                                                                                                                                                                                                                                                                               |                                    |
|                        | 8             | Nome do Paciente                               |                                           |                                                                                                                             | 9                              |                                                     | Data de Nascimento                                                                                                                                                                                                                                                                                                                                                                                                                                            |                                    |
| Dados de Residência    | 10            | (ou) Idade                                     | 1 - Hora<br>2 - Dia<br>3 - Mês<br>4 - Ano | 11                                                                                                                          | Sexo                           | M - Masculino<br>F - Feminino<br>I - Ignorado       |                                                                                                                                                                                                                                                                                                                                                                                                                                                               |                                    |
|                        | 12            | Gestante                                       |                                           | 1-1º Trimestre 2-2º Trimestre 3-3º Trimestre<br>4- Idade gestacional ignorada 5- Não se aplica 6- Não se aplica 9- Ignorado |                                | 13                                                  | Raça/Cor                                                                                                                                                                                                                                                                                                                                                                                                                                                      |                                    |
|                        | 14            | Escolaridade                                   |                                           |                                                                                                                             |                                |                                                     | 0-Analfabeto 1-1ª a 4ª série incompleta do EF (antigo primário ou 1º grau) 2-4ª série completa do EF (antigo primário ou 1º grau) 3-5ª a 8ª série incompleta do EF (antigo ginásio ou 1º grau) 4-Ensino fundamental completo (antigo ginásio ou 1º grau) 5-Ensino médio incompleto (antigo colegial ou 2º grau) 6-Ensino médio completo (antigo colegial ou 2º grau) 7-Educação superior incompleta 8-Educação superior completa 9-Ignorado 10- Não se aplica |                                    |
| Dados de Residência    | 15            | Número do Cartão SUS                           |                                           | 16                                                                                                                          |                                |                                                     | Nome da mãe                                                                                                                                                                                                                                                                                                                                                                                                                                                   |                                    |
|                        | 17            | UF                                             | 18                                        | Município de Residência                                                                                                     |                                | Código (IBGE)                                       | 19                                                                                                                                                                                                                                                                                                                                                                                                                                                            | Distrito                           |
|                        | 20            | Bairro                                         |                                           | 21                                                                                                                          |                                | Logradouro (rua, avenida,...)                       | Código                                                                                                                                                                                                                                                                                                                                                                                                                                                        |                                    |
|                        | 22            | Número                                         | 23                                        |                                                                                                                             | Complemento (apto., casa, ...) |                                                     | 24                                                                                                                                                                                                                                                                                                                                                                                                                                                            | Geo campo 1                        |
|                        | 25            | Geo campo 2                                    |                                           | 26                                                                                                                          |                                | Ponto de Referência                                 | 27                                                                                                                                                                                                                                                                                                                                                                                                                                                            | CEP                                |
|                        | 28            | (DDD) Telefone                                 |                                           | 29                                                                                                                          | Zona                           | 1 - Urbana 2 - Rural<br>3 - Periurbana 9 - Ignorado | 30                                                                                                                                                                                                                                                                                                                                                                                                                                                            | País (se residente fora do Brasil) |

**Dados laboratoriais e conclusão (dengue clássico)**

|                                                                     |                        |                                                                 |           |                                                                 |                |                                                                 |           |
|---------------------------------------------------------------------|------------------------|-----------------------------------------------------------------|-----------|-----------------------------------------------------------------|----------------|-----------------------------------------------------------------|-----------|
| Inv.                                                                | 31                     | Data da Investigação                                            |           | 32                                                              | Ocupação       |                                                                 |           |
|                                                                     | Dados laboratoriais    | Exame Sorológico (IgM)                                          |           | Exame NS1                                                       |                |                                                                 |           |
| 33                                                                  |                        | Data da Coleta                                                  | 34        | Resultado                                                       | 35             | Data da Coleta                                                  |           |
| 1 - Reagente 2 - Não Reagente<br>3 - Inconclusivo 4 - Não Realizado |                        | 1 - Positivo 2 - Negativo<br>3 - Inconclusivo 4 - Não realizado |           |                                                                 |                |                                                                 |           |
| Isolamento Viral                                                    |                        | RT-PCR                                                          |           |                                                                 |                |                                                                 |           |
| 37                                                                  | Data da Coleta         | 38                                                              | Resultado | 39                                                              | Data da Coleta | 40                                                              | Resultado |
| 1 - Positivo 2 - Negativo<br>3 - Inconclusivo 4 - Não realizado     |                        | 1 - Positivo 2 - Negativo<br>3 - Inconclusivo 4 - Não Realizado |           |                                                                 |                | 1 - Positivo 2 - Negativo<br>3 - Inconclusivo 4 - Não Realizado |           |
| Sorotipo                                                            |                        | Histopatologia                                                  |           | Imunohistoquímica                                               |                |                                                                 |           |
| 41                                                                  | 1 - DEN 1<br>3 - DEN 3 | 2 - DEN 2<br>4 - DEN 4                                          | 42        | Resultado                                                       | 43             | Resultado                                                       |           |
| 1 - Positivo 2 - Negativo<br>3 - Inconclusivo 4 - Não Realizado     |                        | 1 - Positivo 2 - Negativo<br>3 - Inconclusivo 4 - Não Realizado |           | 1 - Positivo 2 - Negativo<br>3 - Inconclusivo 4 - Não Realizado |                |                                                                 |           |

**Os casos de dengue com complicações, FHD e SCD: preencher a página seguinte.**

|                              |                                                    |                                                |               |                                                   |          |              |                      |                  |
|------------------------------|----------------------------------------------------|------------------------------------------------|---------------|---------------------------------------------------|----------|--------------|----------------------|------------------|
| Conclusão                    | Local Provável de Infecção (no período de 15 dias) |                                                |               |                                                   |          |              |                      |                  |
|                              | 46                                                 | O caso é autóctone do município de residência? |               |                                                   | 47       | UF           | 48                   | País             |
|                              | 1-Sim 2-Não 3-Indeterminado                        |                                                |               |                                                   |          |              |                      |                  |
|                              | 49                                                 | Município                                      | Código (IBGE) | 50                                                | Distrito | 51           | Bairro               |                  |
|                              | 52                                                 | Doença Relacionada ao Trabalho                 |               | 53                                                |          |              |                      | Evolução do Caso |
| 1 - Sim 2 - Não 9 - Ignorado |                                                    | 1 - Cura<br>3 - Óbito por outras causas        |               | 2 - Óbito por dengue<br>4 - Óbito em investigação |          | 9 - Ignorado |                      |                  |
| 54                           | Data do Óbito                                      |                                                | 55            |                                                   |          |              | Data do Encerramento |                  |

**Dados clínicos (dengue com complicações, FHD e SCD)**

A FHD em geral desenvolve-se entre o 3º e o 5º dia de doença, quando há o recrudescimento da febre. A presença de dor abdominal intensa, hepatomegalia dolorosa, hipotermia com sudorese, letargia/agitação, cianose, arritmias, hipotensão arterial/postural, vômitos persistentes, manifestações neurológicas são indicadores de que o paciente pode evoluir para FHD ou para um quadro mais grave de dengue.

**D dos Clínicos - dengue com complicações e FHD**

56 Manifestações Hemorrágicas?  57 Se sim, quais? 1- Sim 2- Não 9- Ignorado  
 1- Sim 2- Não 9- Ignorado  Epistaxe  Gengivorragia  Metrorragia  Petéquias  
 Hematúria  Sangramento Gastrointestinal  Prova do Laço Positiva

58 Houve extravasamento plasmático?  59 Se sim, Evidenciado por:   
 1-Sim 2-Não 9-Ignorado 1-Hemoconcentração 2-Derrames cavitários 3-Hipoproteinemia

60 Plaquetas (menor) \_\_\_\_\_ mm<sup>3</sup> 61 No Caso de FHD/SCD Especificar   
 1 - Grau I 2 - Grau II 3 - Grau III 4 - Grau IV

62 No Caso de Dengue com complicações, que tipo de complicações?   
 1-Alterações neurológicas 2-Disfunção cardiopulmonar 3-Insuficiência hepática 4-Plaquetas <20.000 mm<sup>3</sup>  
 5-Hemorragia digestiva 6-Derrames cavitários 7-Leucometria < 1000 8-Não se enquadra nos critérios de FHD

63 Ocorreu Hospitalização?  64 Data da Internação \_\_\_\_\_ 65 UF \_\_\_\_\_ 66 Município do Hospital \_\_\_\_\_ Código (IBGE) \_\_\_\_\_  
 1 - Sim 2 - Não 9 - Ignorado

67 Nome do Hospital \_\_\_\_\_ Código \_\_\_\_\_ 68 (DDD) Telefone \_\_\_\_\_

**Informações complementares e observações**

Observações Adicionais

|  |
|--|
|  |
|  |
|  |
|  |
|  |
|  |
|  |
|  |
|  |
|  |
|  |
|  |
|  |
|  |
|  |
|  |
|  |

**Investigador** Município/Unidade de Saúde \_\_\_\_\_ Cód. da Unid. de Saúde \_\_\_\_\_  
 Nome \_\_\_\_\_ Função \_\_\_\_\_ Assinatura \_\_\_\_\_
